# Supplementary material for: Efficacy of Losartan in Hospitalized Patients With COVID-19–Induced Lung Injury: A Randomized Clinical Trial
Source: PubMed Central journal article supplement (PMC8928006; doi:10.1001/jamanetworkopen.2022.2735), 2022-03-16

## Supplemental Online Content

Puskarich MA, Ingraham NE, Merck LH, et al; Angiotensin Receptor Blocker Based Lung Protective Strategies for Inpatients With COVID-19 (ALPS-IP) Investigators. Efficacy of losartan in hospitalized patients with COVID-19–induced lung injury: a randomized clinical trial. *JAMA Netw Open*. 2022;5(3):e222735.  
doi:10.1001/jamanetworkopen.2022.2735

**eTable 1.** PaO<sub>2</sub>:FiO<sub>2</sub> Ratio at Baseline With Day 7 Results

**eTable 2.** Inpatient Nonfatal Adverse Events Per Person-Day, Days 1-15

**eTable 3.** Losartan and Carboxylosartan Pharmacokinetic Characteristics

**eTable 4.** Association Between Treatment Group and Circulatory RAAS Components After Adjusting for Baseline and Time and Jointly Modeling the Outcome and Time-to-Discharge

**eFigure 1.** Effect of Losartan on Relative Viral Load

**eFigure 2.** Losartan and Carboxylosartan Concentrations

**eFigure 3.** Plasma Log(All) From Days 1-15, by Treatment Allocation

**eFigure 4.** Plasma Log(angiotensin-[1-7]) From Days 1-15, by Treatment Allocation

This supplemental material has been provided by the authors to give readers additional information about their work.

**eTable 1.** PaO<sub>2</sub>:FiO<sub>2</sub> Ratio at Baseline With Day 7 Results

| Reported quantities reflect Median (IQR) or N (%). |                             |                              |
|----------------------------------------------------|-----------------------------|------------------------------|
|                                                    | <b>Placebo</b><br>(n = 104) | <b>Losartan</b><br>(n = 101) |
| P/F Ratio at Baseline                              | 214.1 [138.4 - 253.4]       | 214.1 [153.6 - 258.4]        |
| Discharged on or before Day 7                      | 62 (59.6%)                  | 49 (48.5%)                   |
| Hospitalized through Day 7                         | 39 (37.5%)                  | 50 (49.5%)                   |
| Dead on or before Day 7                            | 3 (2.9%)                    | 2 (2.0%)                     |
| P/F Ratio Missing on Day 7 (Alive)                 | 16 (15.4%)                  | 10 (9.9%)                    |

**eTable 2.** Inpatient Nonfatal Adverse Events Per Person-Day, Days 1-15

|                                                          | Losartan         |               | Placebo          |               |         |
|----------------------------------------------------------|------------------|---------------|------------------|---------------|---------|
|                                                          | Number of Events | Rate (SD)     | Number of Events | Rate (SD)     | P-value |
| <b>Adverse events (including serious adverse events)</b> |                  |               |                  |               |         |
| Cardiovascular                                           | 26               | 0.021 (0.053) | 24               | 0.021 (0.077) | 0.96    |
| Endocrine                                                | 2                | 0.001 (0.010) | 1                | 0.001 (0.007) | 0.51    |
| Ear, Nose, and Throat                                    | 0                | 0.000 (0.000) | 1                | 0.001 (0.007) | 0.32    |
| Gastrointestinal                                         | 10               | 0.007 (0.021) | 3                | 0.002 (0.011) | 0.04    |
| Genitourinary                                            | 3                | 0.002 (0.011) | 1                | 0.002 (0.016) | 0.84    |
| Hematologic                                              | 9                | 0.006 (0.022) | 6                | 0.005 (0.028) | 0.72    |
| Musculoskeletal                                          | 0                | 0.000 (0.000) | 0                | 0.000 (0.000) |         |
| Neurologic                                               | 4                | 0.003 (0.013) | 4                | 0.003 (0.016) | 0.97    |
| Renal                                                    | 20               | 0.014 (0.051) | 21               | 0.017 (0.055) | 0.68    |
| Respiratory                                              | 30               | 0.023 (0.051) | 27               | 0.023 (0.064) | 0.91    |
| Skin                                                     | 0                | 0.000 (0.000) | 2                | 0.001 (0.009) | 0.16    |
| Total                                                    | 104              | 0.077 (0.154) | 90               | 0.074 (0.204) | 0.89    |
| <b>Serious Adverse Events Only</b>                       |                  |               |                  |               |         |
| Cardiovascular                                           | 14               | 0.011 (0.035) | 6                | 0.005 (0.023) | 0.16    |
| Endocrine                                                | 0                | 0.000 (0.000) | 0                | 0.000 (0.000) |         |
| Ear, Nose, and Throat                                    | 0                | 0.000 (0.000) | 0                | 0.000 (0.000) |         |
| Gastrointestinal                                         | 1                | 0.001 (0.007) | 0                | 0.000 (0.000) | 0.32    |
| Genitourinary                                            | 0                | 0.000 (0.000) | 0                | 0.000 (0.000) |         |

|                 |    |               |    |               |      |
|-----------------|----|---------------|----|---------------|------|
| Hematologic     | 1  | 0.001 (0.007) | 0  | 0.000 (0.000) | 0.32 |
| Musculoskeletal | 0  | 0.000 (0.000) | 0  | 0.000 (0.000) |      |
| Neurologic      | 2  | 0.001 (0.009) | 1  | 0.001 (0.007) | 0.55 |
| Renal           | 1  | 0.001 (0.007) | 2  | 0.002 (0.013) | 0.47 |
| Respiratory     | 19 | 0.016 (0.044) | 21 | 0.019 (0.063) | 0.75 |
| Skin            | 0  | 0.000 (0.000) | 0  | 0.000 (0.000) |      |
| Total           | 38 | 0.030 (0.069) | 30 | 0.026 (0.082) | 0.68 |

**eTable 3.** Losartan and Carboxylosartan Pharmacokinetic Characteristics

| Study ID      |           | Losartan       |                          |                         |                              |                                |                                 |             | Carboxylosartan (LCA) |                         |                                |
|---------------|-----------|----------------|--------------------------|-------------------------|------------------------------|--------------------------------|---------------------------------|-------------|-----------------------|-------------------------|--------------------------------|
|               | Dose (mg) | Half-Life (hr) | C <sub>max</sub> (ng/mL) | C <sub>6h</sub> (ng/mL) | est C <sub>12h</sub> (ng/mL) | AUC <sub>0-6h</sub> (hr*ng/mL) | AUC <sub>0-12h</sub> (hr*ng/mL) | CL/F (L/hr) | C <sub>max</sub>      | C <sub>6h</sub> (ng/mL) | AUC <sub>0-6h</sub> (hr*ng/mL) |
| 1             | 50        | 2.87           | 268.6                    | 102.2                   | 22.98                        | 1018.0                         | 1336.5                          | 37.41       | 16.5                  | 16.5                    | 66.6                           |
| 2             | 50        | 1.53           | 1029                     | 168.8                   | 11.22                        | 3101.3                         | 3450.0                          | 14.49       | 263.1                 | 263.1                   | 1206.2                         |
| 3             | 50        | 1.56           | 145.6                    | 24.76                   | 1.77                         | 449.7                          | 501.9                           | 99.61       | 357.7                 | 205.7                   | 1803.6                         |
| 4             | 50        | 1.77           | 217.9                    | 45.38                   | 3.99                         | 657.9                          | 760.0                           | 65.79       | 129.2                 | 113.6                   | 578.0                          |
| 5             | 50        | 5.27           | 131.4                    | 101                     | 45.87                        | 565.0                          | 984.0                           | 50.81       | 164.8                 | 164.8                   | 375.4                          |
| 6             | 50        | 2.45           | 110.8                    | 35.76                   | 6.27                         | 395.3                          | 496.9                           | 100.61      | 293.5                 | 293.5                   | 1114.8                         |
| 7             | 50        | 1.21           | 586.4                    | 59.14                   | 1.78                         | 1493.2                         | 1591.5                          | 31.42       | 667.1                 | 338.5                   | 2771.4                         |
| <b>Median</b> |           | 1.77           | 217.9                    | 59.1                    | 6.3                          | 657.9                          | 984.0                           | 50.8        | 263.1                 | 205.7                   | 1114.8                         |
| <b>Min</b>    |           | 1.21           | 110.8                    | 24.8                    | 1.8                          | 395.3                          | 496.9                           | 14.5        | 16.5                  | 16.5                    | 66.6                           |
| <b>Max</b>    |           | 5.27           | 1029.0                   | 168.8                   | 45.9                         | 3101.3                         | 3450.0                          | 100.6       | 667.1                 | 338.5                   | 2771.4                         |

C<sub>max</sub>, maximum concentration in plasma; C<sub>6h</sub>, measured concentration at 6 hours post dose; est C<sub>12h</sub>, estimated concentration at 12 hours post dose; AUC<sub>0-6h</sub>, area under the concentration time curve to 6 hours post dose; AUC<sub>0-12h</sub>, estimated area under the concentration time curve to 12 hours post dose; CL/F, apparent oral clearance.

**eTable 4.** Association Between Treatment Group and Circulatory RAAS Components After Adjusting for Baseline and Time and Jointly Modeling the Outcome and Time-to-Discharge

Death treated as censored. Significant p values for log(baseline) indicate significant association of baseline measurements with later measurements, after controlling for treatment allocation and time.

| Covariate             | ACE                     |         | ACE2                    |         | Ang-(1–7)               |         | Ang II                  |         |
|-----------------------|-------------------------|---------|-------------------------|---------|-------------------------|---------|-------------------------|---------|
|                       | Ratio of Geometric Mean | p-value | Ratio of Geometric Mean | p-value | Ratio of Geometric Mean | p-value | Ratio of Geometric Mean | p-value |
| <b>Losartan</b>       | 0.90<br>(0.72, 1.13)    | 0.39    | 1.17<br>(0.71, 1.92)    | 0.54    | 0.99<br>(0.63, 1.54)    | 0.95    | 1.07<br>(0.76, 1.50)    | 0.72    |
| <b>Log (baseline)</b> | 2.73<br>(2.37, 3.13)    | <0.01   | 2.15<br>(1.87, 2.47)    | <0.01   | 1.71<br>(1.44, 2.05)    | <0.01   | 1.62<br>(1.23, 2.15)    | <0.01   |
| <b>Day</b>            | 1.02<br>(1.00, 1.04)    | 0.12    | 1<br>(0.97, 1.04)       | 0.98    | 0.98<br>(0.94, 1.01)    | 0.16    | 1 (0.97, 1.03)          | 0.96    |

ACE - Angiotensin-converting enzyme activity; ACE 2 - Angiotensin-converting enzyme 2 activity; Ang-(1–7) - angiotensin-(1–7) concentration; Ang II - angiotensin II concentration

**eFigure 1. Effect of Losartan on Relative Viral Load**

Relative viral load (RVL) is corrected to human marker DNA to control for specimen quality. Placebo is in red lines and losartan in blue lines with 95% CIs at each assessment. Losartan did not statistically significantly affect the cycle threshold or relative viral load overall or at any time point.

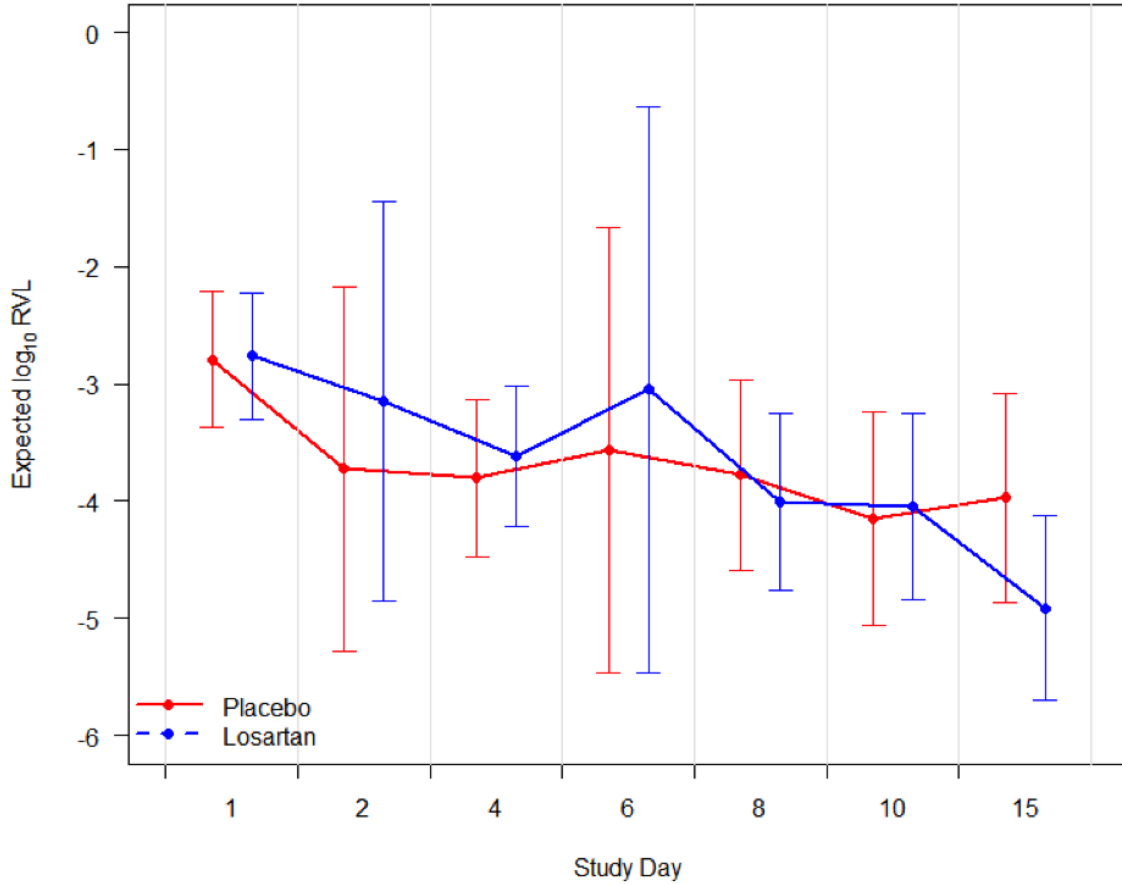

**eFigure 2.** Losartan and Carboxylosartan Concentrations (median and range)

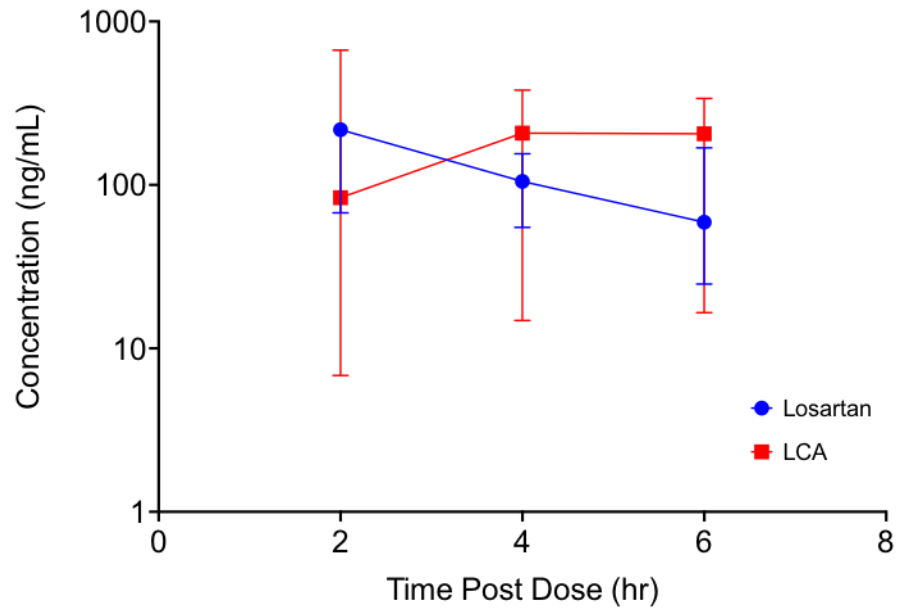



**eFigure 3.** Plasma Log(All) From Days 1-15, by Treatment Allocation  
Participants with missing values are indicated with a red “x”, otherwise each participant’s values are connected with a grey line.

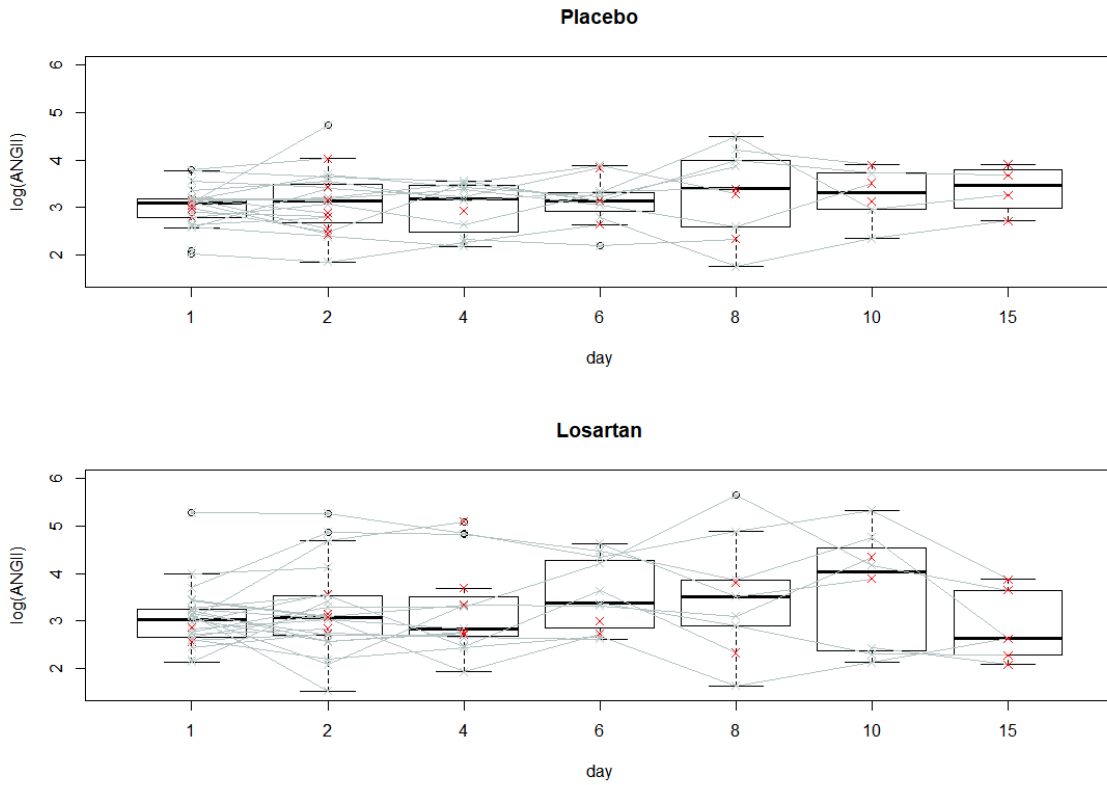

**eFigure 4.** Plasma Log(angiotensin-[1-7]) From Days 1-15, by Treatment Allocation  
Participants with missing values are indicated with a grey “x” when present and a red “x” if missing, connected with a grey line.

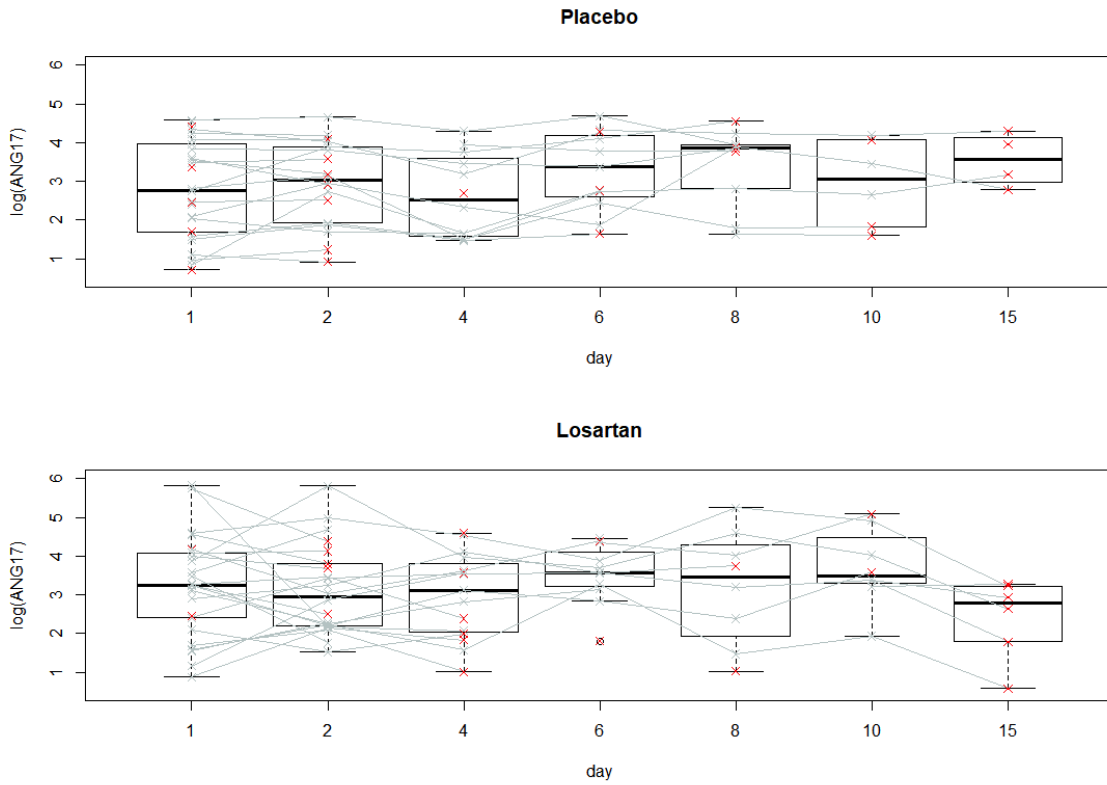

Supplement: jamanetwopen-e222735-s002.pdf [file jamanetwopen-e222735-s002.pdf]
