# Supplementary material for: Efficacy of Losartan in Hospitalized Patients With COVID-19–Induced Lung Injury: A Randomized Clinical Trial
Source: PubMed Central journal article supplement (PMC8928006; doi:10.1001/jamanetworkopen.2022.2735), 2022-03-16
Supplement: jamanetwopen-e222735-s003.pdf [file jamanetwopen-e222735-s003.pdf]

\*Indicates required information. Only first name, last name, and suffix will appear in PubMed.

| <b>*Group Name(s): Angiotensin Receptor Blocker Based Lung Protective Strategies for Inpatients with COVID-19 (ALPS-IP) Investigators</b> |                   |                              |                  |                                                                                                                   |                                          |                                                                |                                                                                            |
|-------------------------------------------------------------------------------------------------------------------------------------------|-------------------|------------------------------|------------------|-------------------------------------------------------------------------------------------------------------------|------------------------------------------|----------------------------------------------------------------|--------------------------------------------------------------------------------------------|
| <b>*First Name and Middle Initial(s)</b>                                                                                                  | <b>*Last Name</b> | <b>*Suffix (eg, Jr, III)</b> | Academic Degrees | Institution                                                                                                       | Location (city, state/province, country) | Role or Contribution, eg, chair, principal investigator        | Group (if more than 1 Group listed in the byline) and/or Subgroup (eg, Steering Committee) |
| Andrew C                                                                                                                                  | Nelson            |                              | MD PhD           | Department of Laboratory Medicine and Pathology, University of Minnesota                                          | Minneapolis, MN, USA                     | Oversaw Viral load measurement and interpretation              |                                                                                            |
| Alex                                                                                                                                      | Hall              |                              | DHSc             | Department of Emergency Medicine, Emory University School of Medicine                                             | Atlanta, GA, USA                         | Site Investigator                                              |                                                                                            |
| David                                                                                                                                     | Wright            |                              | MD               | Department of Emergency Medicine, Emory University School of Medicine                                             | Atlanta, GA, USA                         | Site PI                                                        |                                                                                            |
| Ronald A                                                                                                                                  | Reilkoff          |                              | MD               | Division of Pulmonary, Allergy, Critical Care and Sleep Medicine, Department of Medicine, University of Minnesota | Minneapolis, MN, USA                     | Site Investigator                                              |                                                                                            |
| Tyler                                                                                                                                     | Bold              |                              | MD PhD           | Division of Infectious Diseases, Department of Medicine, University of Minnesota                                  | Minneapolis, MN, USA                     | Oversaw biospecimen collection, processing, and analysis       |                                                                                            |
| Kenneth                                                                                                                                   | Beckman           |                              | PhD              | University of Minnesota Genomics Center                                                                           | Minneapolis, MN, USA                     | Oversaw Viral load measurement and interpretation              |                                                                                            |
| Ryan                                                                                                                                      | Langlois          |                              | PhD              | Department of Microbiology and Immunology, University of Minnesota                                                | Minneapolis, MN, USA                     | Assisted with biospecimen collection, processing, and analysis |                                                                                            |

## Supplemental Online Content: Nonauthor Collaborators

\*Indicates required information. Only first name, last name, and suffix will appear in PubMed.

| *First Name and Middle Initial(s) | *Last Name | *Suffix (eg, Jr, III) | Academic Degrees | Institution                                                                   | Location (city, state/province, country) | Role or Contribution, eg, chair, principal investigator        | Group (if more than 1 Group listed in the byline) and/or Subgroup (eg, Steering Committee) |
|-----------------------------------|------------|-----------------------|------------------|-------------------------------------------------------------------------------|------------------------------------------|----------------------------------------------------------------|--------------------------------------------------------------------------------------------|
| Matthew T                         | Aliota     |                       | PhD              | Department of Veterinary and Biomedical Sciences, University of Minnesota     | Twin Cities, St. Paul, MN, USA           | Assisted with biospecimen collection, processing, and analysis |                                                                                            |
| James                             | Galbriath  |                       | MD               | Department of Emergency Medicine, University of Mississippi Medical Center    | Jackson, MS USA                          | Site Investigator                                              |                                                                                            |
| Margaret                          | Beyer      |                       | BS               | Department of Emergency Medicine, Henry Ford Hospital, Wayne State University | Detroit, MI, USA                         | Study Coordinator                                              |                                                                                            |
| Chas                              | Salmen     |                       | MD               | Department of Surgery, University of Minnesota                                | Minneapolis, MN, USA                     | Site Investigator                                              |                                                                                            |
| Dana                              | Byrne      |                       | MD               | Department of Internal Medicine, Cooper University Health Care                | Camden, NJ, USA                          | Site PI                                                        |                                                                                            |
| Brian                             | Roberts    |                       | MD               | Department of Emergency Medicine, Cooper University Health Care               | Camden, NJ, USA                          | Site Investigator                                              |                                                                                            |
