# Supplementary material for: Efficacy of Losartan in Hospitalized Patients With COVID-19–Induced Lung Injury: A Randomized Clinical Trial
Source: PubMed Central journal article supplement (PMC8928006; doi:10.1001/jamanetworkopen.2022.2735), 2022-03-16
Supplement: jamanetwopen-e222735-s004.pdf [file jamanetwopen-e222735-s004.pdf]

## Data Sharing Statement

Puskarich. Efficacy of Losartan in Hospitalized Patients With COVID-19-Induced Lung Injury. *JAMA Netw Open*. Published March 16, 2022. doi:10.1001/jamanetworkopen.2022.2735

### Data

**Data available:** Yes

**Data types:** Deidentified participant data

**How to access data:** University of Minnesota Data Repository (DRUM)

**When available:** beginning date: 07-01-2022

### Supporting Documents

**Document types:** None

### Additional Information

**Who can access the data:** N/A

**Types of analyses:** N/A

**Mechanisms of data availability:** N/A

**Any additional restrictions:** N/A
